# Supplementary material
Source: PubMed Central journal article supplement (PMC3353808)
Supplement: NIHMS359525-supplement-1.pdf [file NIHMS359525-supplement-1.pdf]

SUPPLEMENTAL MATERIAL

Supplemental table. Adjusted Prevalence (%) of Low Risk Profile at Y20 by AHEI-based Number of Healthy Lifestyle factors (HLF) , Y0 to Y20 among CARDIA Study participants.

|                               | Number of HLFs* |      |      |      |      | p-trend |
|-------------------------------|-----------------|------|------|------|------|---------|
|                               | 0-1             | 2    | 3    | 4    | 5    |         |
| All participants <sup>†</sup> | 3.2             | 14.4 | 28.6 | 40.3 | 54.0 | <0.0001 |
| All participants <sup>‡</sup> | 6.1             | 15.7 | 28.5 | 41.0 | 55.0 | <0.0001 |
| Black men <sup>§</sup>        | 3.3             | 9.2  | 14.6 | 26.4 | 34.2 | <0.0001 |
| White men <sup>§</sup>        | 2.4             | 14.1 | 24.7 | 41.1 | 45.2 | <0.0001 |
| Black women <sup>§</sup>      | 3.5             | 11.8 | 28.5 | 38.3 | 60.2 | <0.0001 |
| White women <sup>§</sup>      | 0.7             | 20.6 | 41.2 | 48.9 | 66.3 | <0.0001 |

\*Based on the average of Y0, Y7 and Y20 data.

<sup>†</sup> Based on imputed data (n=3154) and adjusted for age, race, and sex.

<sup>‡</sup> Based on complete data sample (n=2336) and adjusted for age, race, and sex.

<sup>§</sup> Age adjusted.
